# Supplementary material for: Experimental and Computational Study for the Design of Sulfathiazole Dosage Form with Clay Mineral
Source: MDPI journal article supplement (doi:10.3390/pharmaceutics15020575), 2023-02-08
Supplement: s1 [file s1]

# Supplementary Materials: Experimental and Computational Study for the Design of Sulfathiazole Dosage Form with Clay Mineral

Eugenia Moreno-Domínguez <sup>1</sup>, Ana Borrego-Sánchez <sup>1,†,\*</sup>, Rita Sánchez-Espejo <sup>1</sup>, César Viseras <sup>1,2</sup> and Claro Ignacio Sainz-Díaz <sup>2</sup>

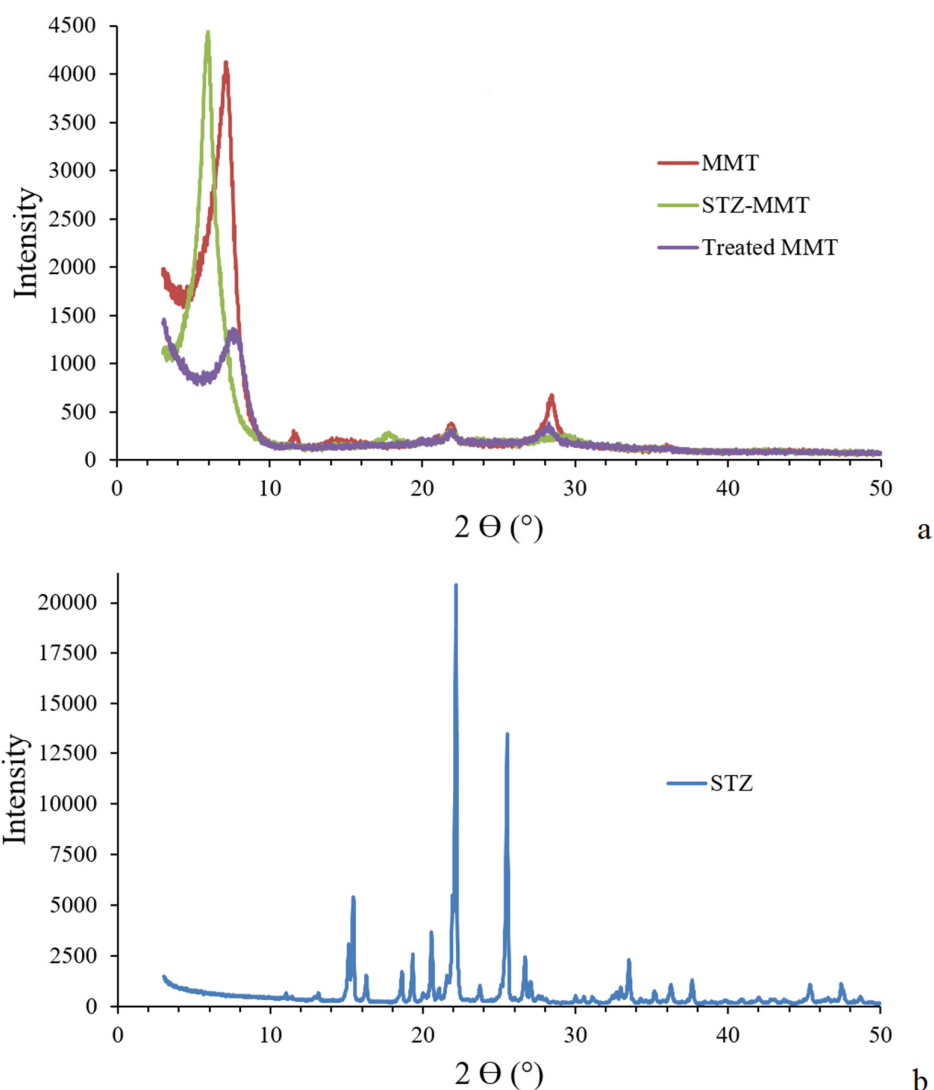

**Figure S1.** Powder X-ray diffraction patterns of the oriented aggregates of the MMT, STZ-MMT, Treated MMT (a) and STZ (b) samples.

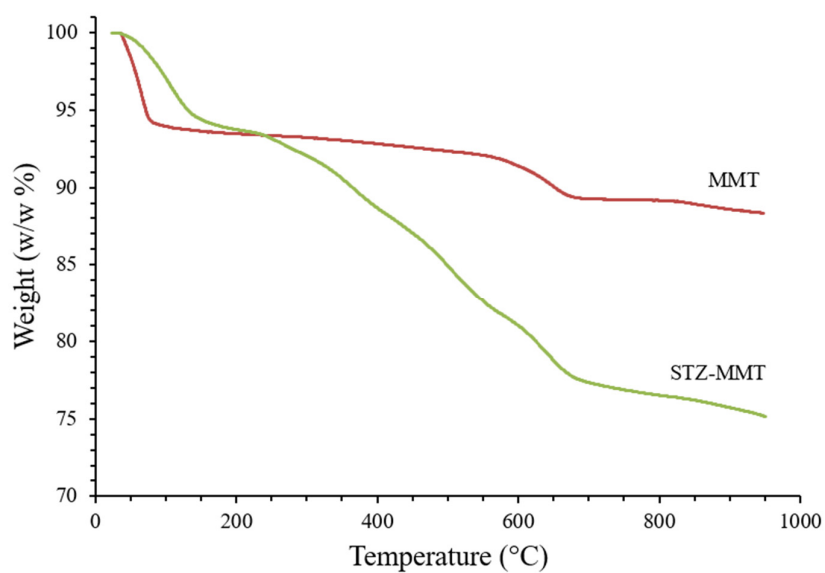

Figure S2. TGA profiles of MMT and STZ-MMT samples.

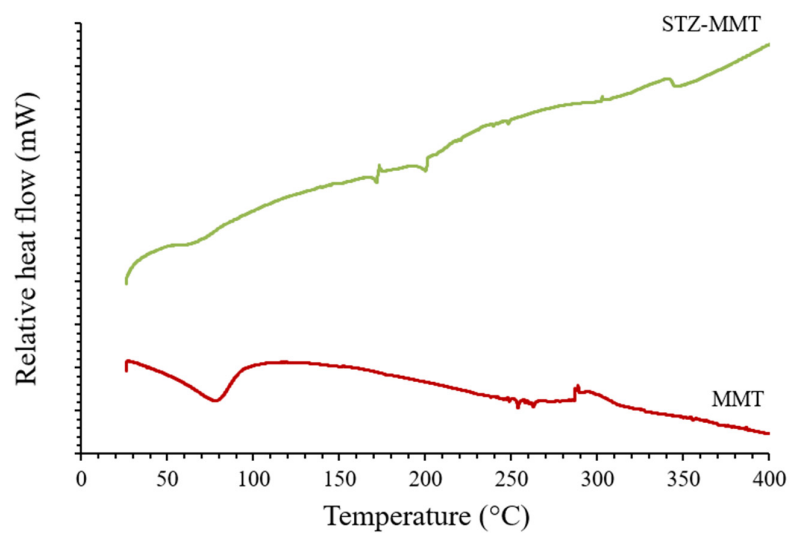

Figure S3. Enlarged DSC profiles of MMT and STZ-MMT.

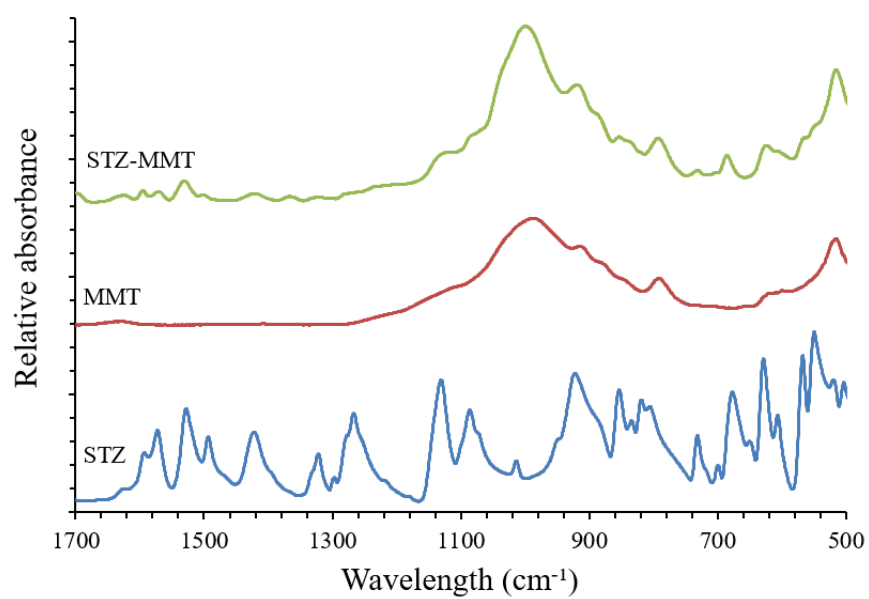

**Figure S4.** Zoom of the FTIR spectra of STZ, MMT and STZ-MMT.
